# Supplementary material for: Synthesis and characterization of Co–Al–Fe nonstoichiometric spinel-type catalysts for catalytic CO oxidation
Source: Royal Society of Chemistry journal article supplement (doi:10.1039/c6ra02204a), 2016-01-01
Supplement: c6ra02204a1.pdf [file c6ra02204a1.pdf]

## Electronic Supplementary Information

### **Synthesis and Characterization of Co-Al-Fe Nonstoichiometric Spinel-Type Catalysts for Catalytic CO Oxidation**

Min Lv, Xiaoli Guo, Zhongpeng Wang\*, Ligu Wang, Qian Li, Zhaoliang Zhang

*School of Resources and Environment, University of Jinan, 336 Nanxinhuangxi  
Road, Jinan 250022, China*

\*E-mail: [chm\\_wangzp@ujn.edu.cn](mailto:chm_wangzp@ujn.edu.cn); Tel/Fax: +86-531-82769233

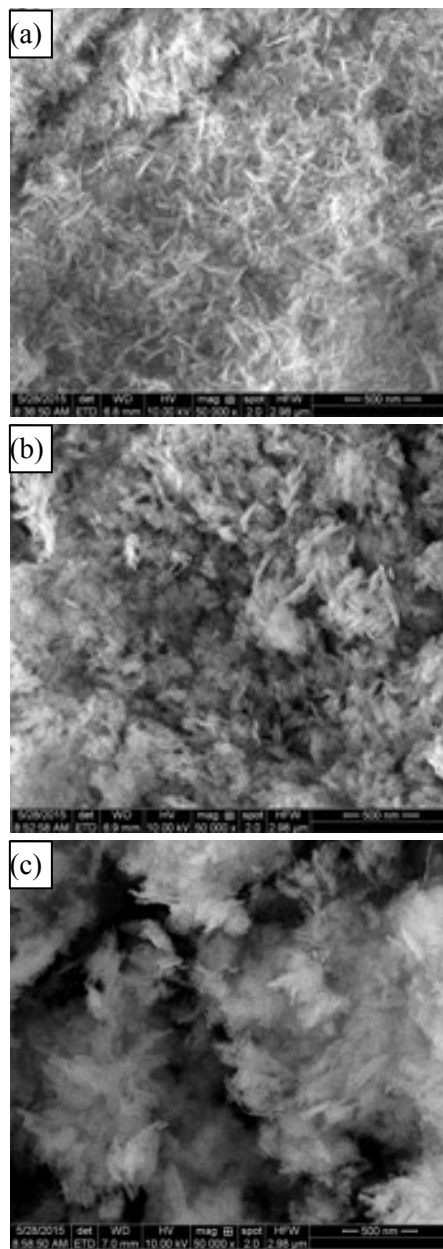

**Fig.S1** SEM micrographs of spinel sample. (a) CAFO. (b) CAF2. (c) CAF4.

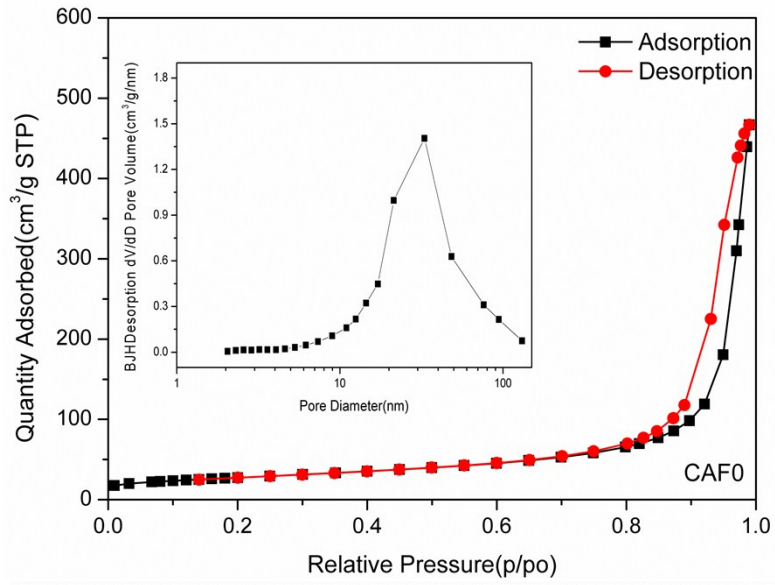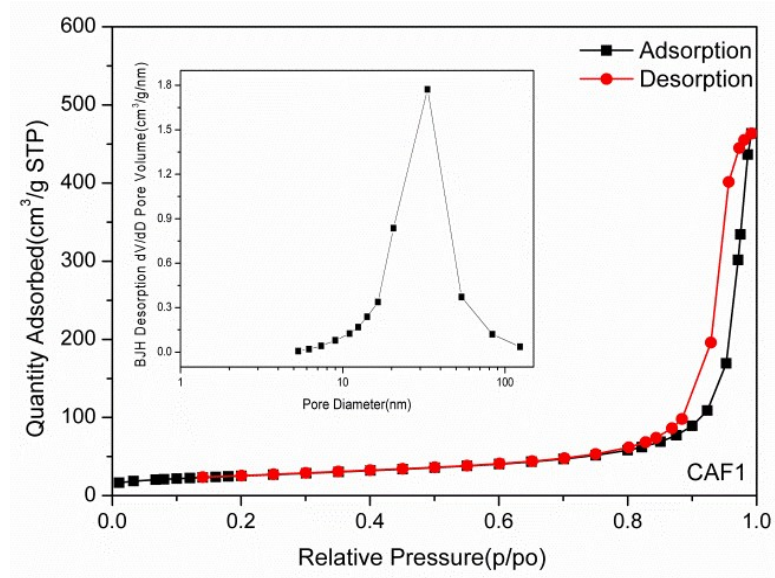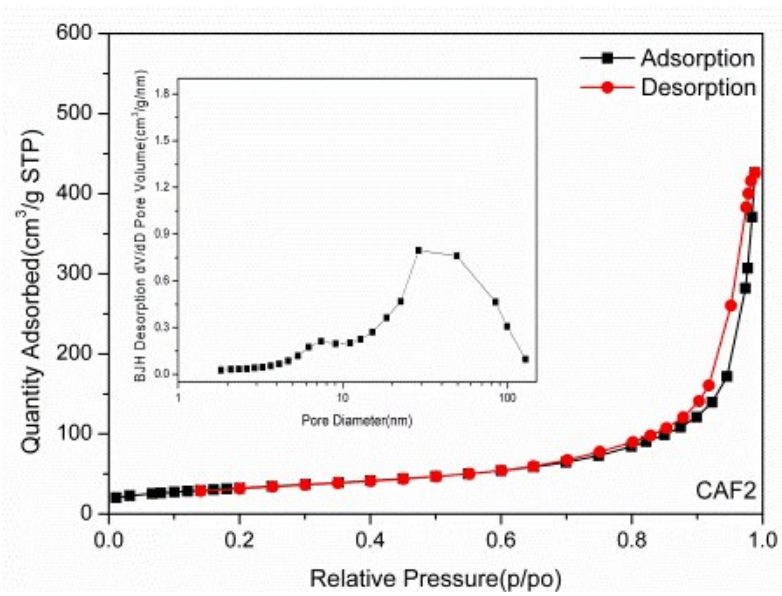

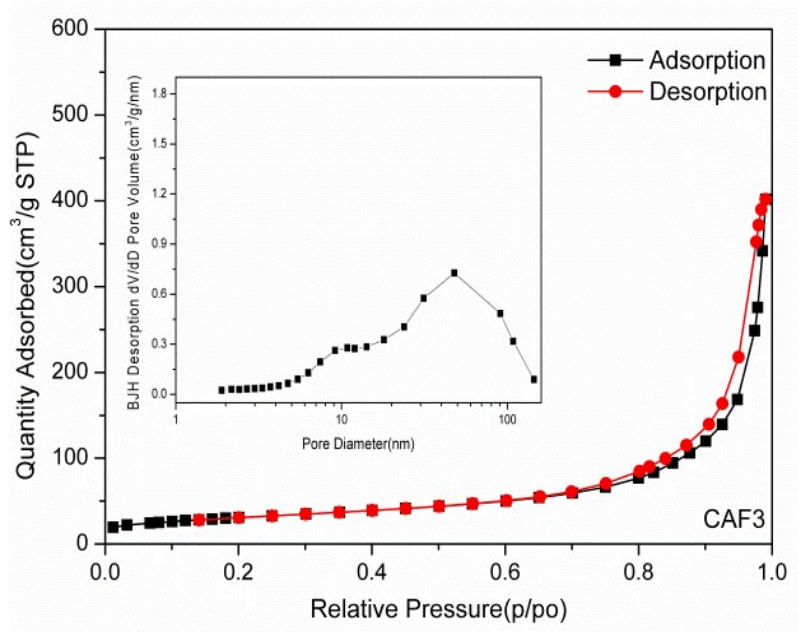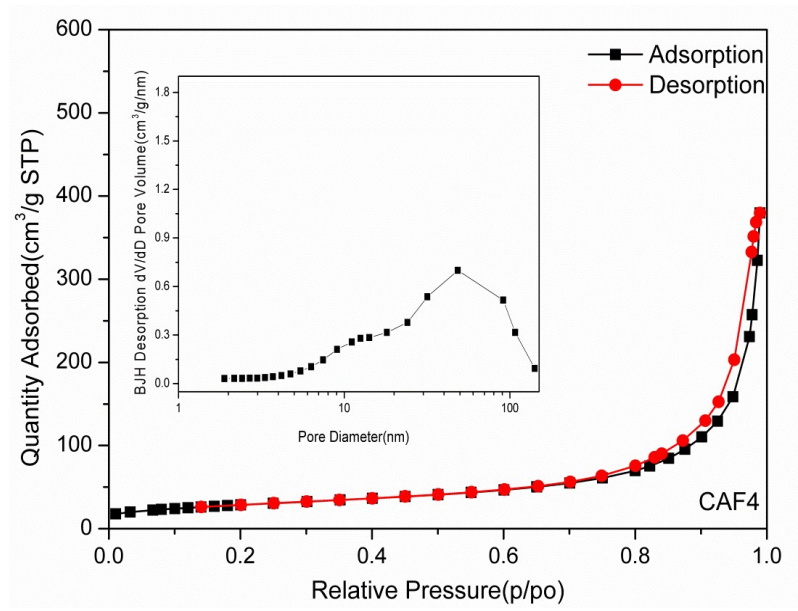

**Fig. S2** N<sub>2</sub> Adsorption and desorption isotherms of the mixed oxides.
